# Supplementary material for: Real-World Data Validation of NAPOLI-1 Nomogram for the Prediction of Overall Survival in Metastatic Pancreatic Cancer
Source: MDPI journal article supplement (doi:10.3390/cancers15041008), 2023-02-05
Supplement: s1 [file s1]

**Table S1.** Multivariable Cox regression of factors in NAPOLI-1 nomogram (n = 473)

|                                                 | HR    | (95% CI)      | Wald p-Value |
|-------------------------------------------------|-------|---------------|--------------|
| Baseline ECOG Performance Score, $\geq 1$ vs. 0 | 0.840 | (0.642-1.100) | 0.2063       |
| Baseline albumin, $\geq 4$ g/dL vs. $< 4$ g/dL  | 0.721 | (0.568-0.915) | 0.0073       |
| Neutrophil lymphocyte ratio, $\leq 5$ vs. $> 5$ | 0.650 | (0.511-0.827) | 0.0004       |
| No liver metastasis vs. liver metastases        | 0.653 | (0.509-0.839) | 0.0008       |
| Baseline CA19-9 $\leq 1542$ vs. $> 1542$        | 0.574 | (0.457-0.721) | $< 0.0001$   |
| Stage I to III vs. stage IV at diagnosis        | 0.763 | (0.594-0.979) | 0.0338       |
| Body mass index $> 25$ vs. $\leq 25$            | 1.035 | (0.764-1.403) | 0.8201       |

**Table S2.** Multivariable Cox regression of other covariates with NAPOLI-1 nomogram risk score (n =473)

|                                                    | HR    | (95% CI)      | Wald p-Value |
|----------------------------------------------------|-------|---------------|--------------|
| NAPOLI-1 nomogram risk score                       | 0.996 | (0.995-0.997) | <0.0001      |
| Age>65 vs. ≤65                                     | 1.255 | (0.989-1.593) | 0.0612       |
| Gender, male vs. female                            | 1.273 | (1.009-1.607) | 0.0412       |
| Relative dose intensity at 6-week                  | 0.991 | (0.989-0.994) | <0.0001      |
| Primary tumor location: head of pancreas vs. other | 0.912 | (0.712-1.167) | 0.4643       |
| Whipple operation: yes vs. no                      | 0.697 | (0.489-0.996) | 0.0476       |
| Prior exposure of fluorouracil, yes vs. no         | 1.506 | (1.084-2.092) | 0.0145       |
| Prior exposure of irinotecan, yes vs. no           | 1.259 | (0.900-1.762) | 0.1776       |
| Prior exposure of platinum, yes vs. no             | 1.253 | (0.965-1.626) | 0.0898       |
| Number of metastatic sites                         | 1.075 | (0.938-1.233) | 0.2949       |

**Table S3.** Model in patients without missing value (n=264)

| Model 1<br>NAPOLI-1 nomogram |                     |         | Model 2<br>NAPOLI-1 nomogram and cumulative dose |                      |         |
|------------------------------|---------------------|---------|--------------------------------------------------|----------------------|---------|
| Parameter                    | HR (95%CI)          | P-value | Parameter                                        | HR (95%CI)           | P-value |
| Nomogram risk score          | 0.996 (0.995-0.997) | <0.0001 | Nomogram risk score                              | 0.996 (0.995-0.997)  | <0.0001 |
|                              |                     |         | Relative dose intensity<br>at 6-week >80%        | Reference            | -       |
|                              |                     |         | Relative dose intensity<br>at 6-week 60-80%      | 1.310 (0.813- 2.110) | 0.2658  |
|                              |                     |         | Relative dose intensity<br>at 6-week <60%        | 2.092 (1.332- 3.287) | 0.0013  |
